# Supplementary material for: A Flavone Constituent from Myoporum bontioides Induces M-Phase Cell Cycle Arrest of MCF-7 Breast Cancer Cells
Source: MDPI journal article supplement (doi:10.3390/molecules22030472), 2017-03-15
Supplement: s1 [file s1]

# Supplementary Materials: A Flavone Constituent from *Myoporum bontioides* Induces M-phase Cell Cycle Arrest of MCF-7 Breast Cancer Cells

Jing-Ru Weng, Li-Yuan Bai, Wei-Yu Lin, Chang-Fang Chiu, Yu-Chang Chen, Shi-Wei Chao, and Chia-Hsien Feng

| Figure |                                                                                 | Page |
|--------|---------------------------------------------------------------------------------|------|
| S1     | <sup>1</sup> H NMR spectrum (600 MHz, CD <sub>3</sub> OD) of compound <b>1</b>  | 2    |
| S2     | <sup>13</sup> C NMR spectrum (150 MHz, CD <sub>3</sub> OD) of compound <b>1</b> | 3    |
| S3     | HMQC spectrum of compound <b>1</b>                                              | 4    |
| S4     | HMBC spectrum of compound <b>1</b>                                              | 5    |
| S5     | NOESY spectrum of compound <b>1</b>                                             | 6    |

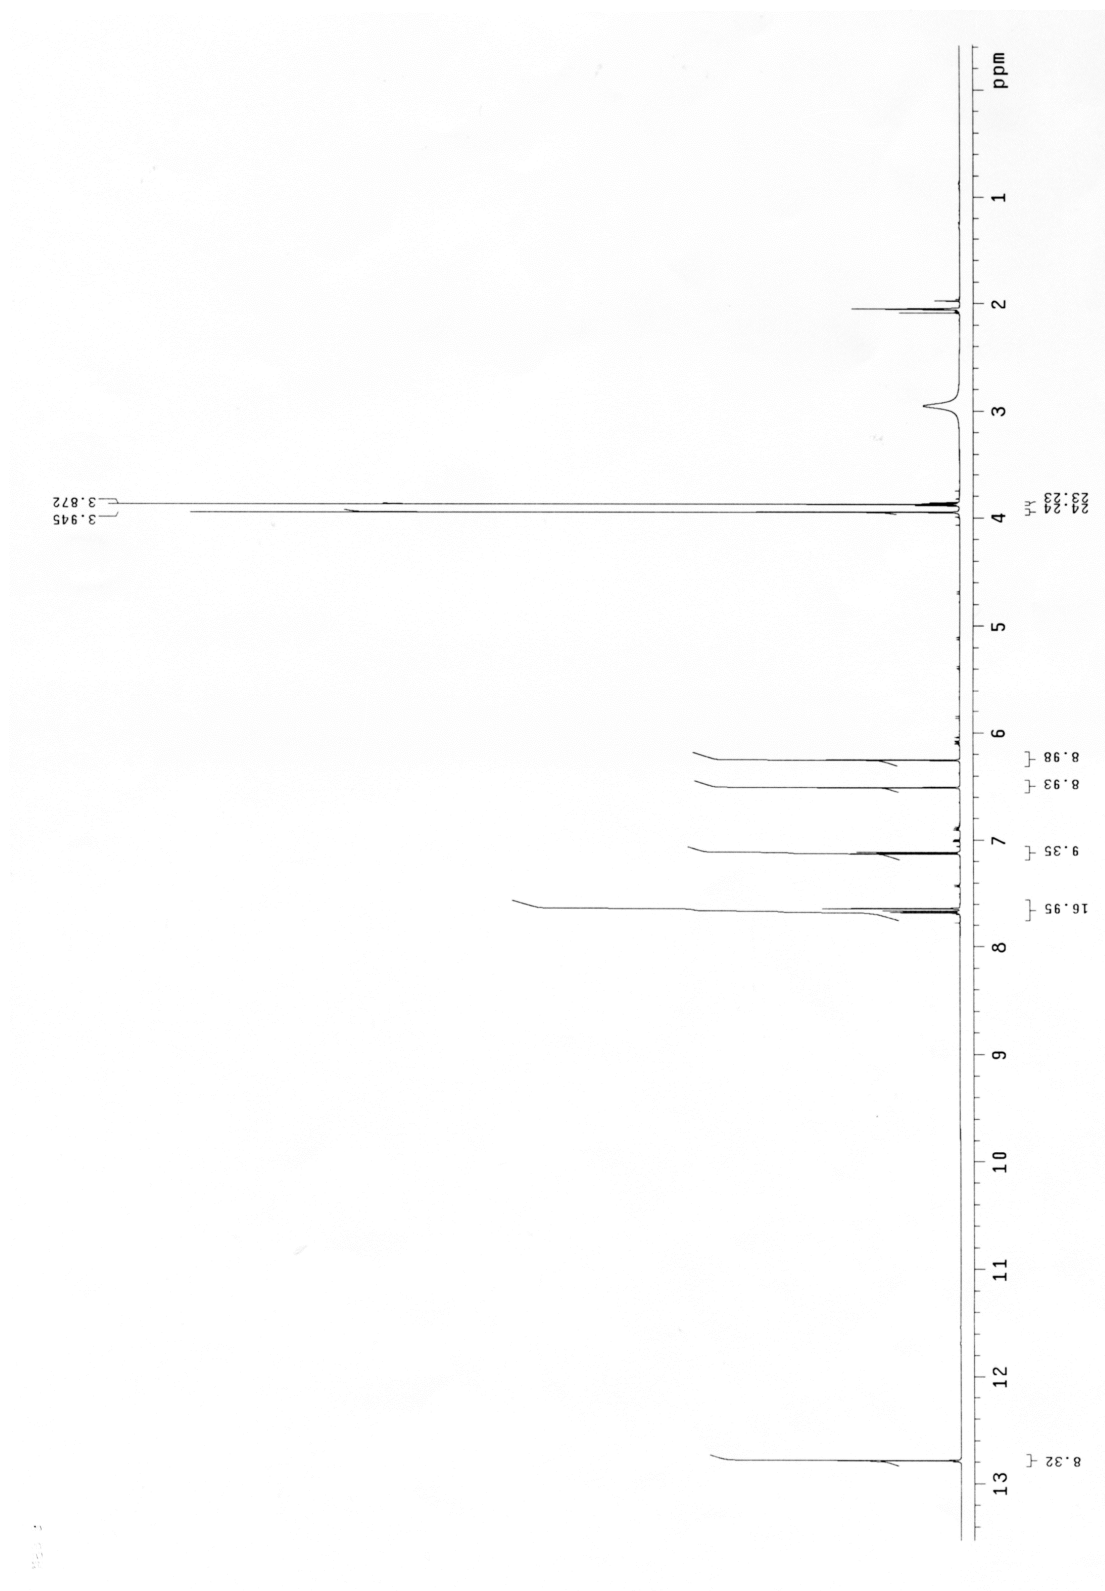

Figure S1.  $^1\text{H}$  NMR spectrum (600 MHz,  $\text{CD}_3\text{OD}$ ) of compound **1**

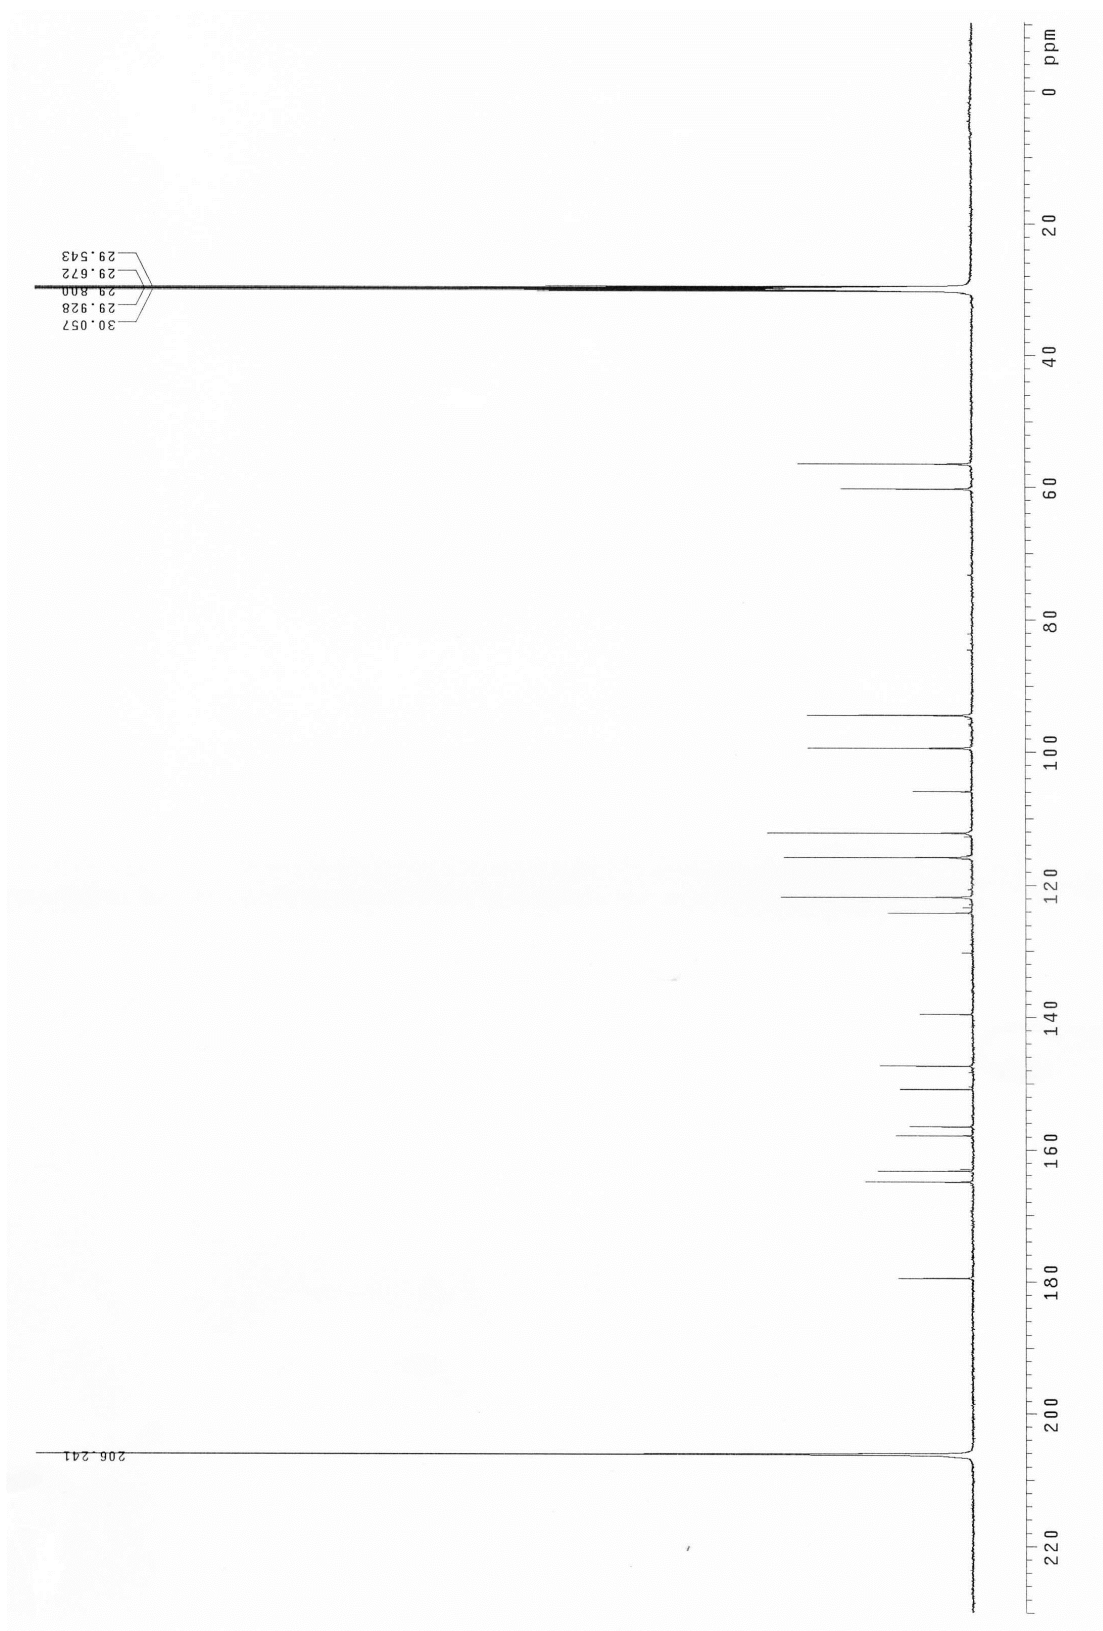

Figure S2.  $^{13}\text{C}$  NMR spectrum (150 MHz,  $\text{CD}_3\text{OD}$ ) of compound **1**

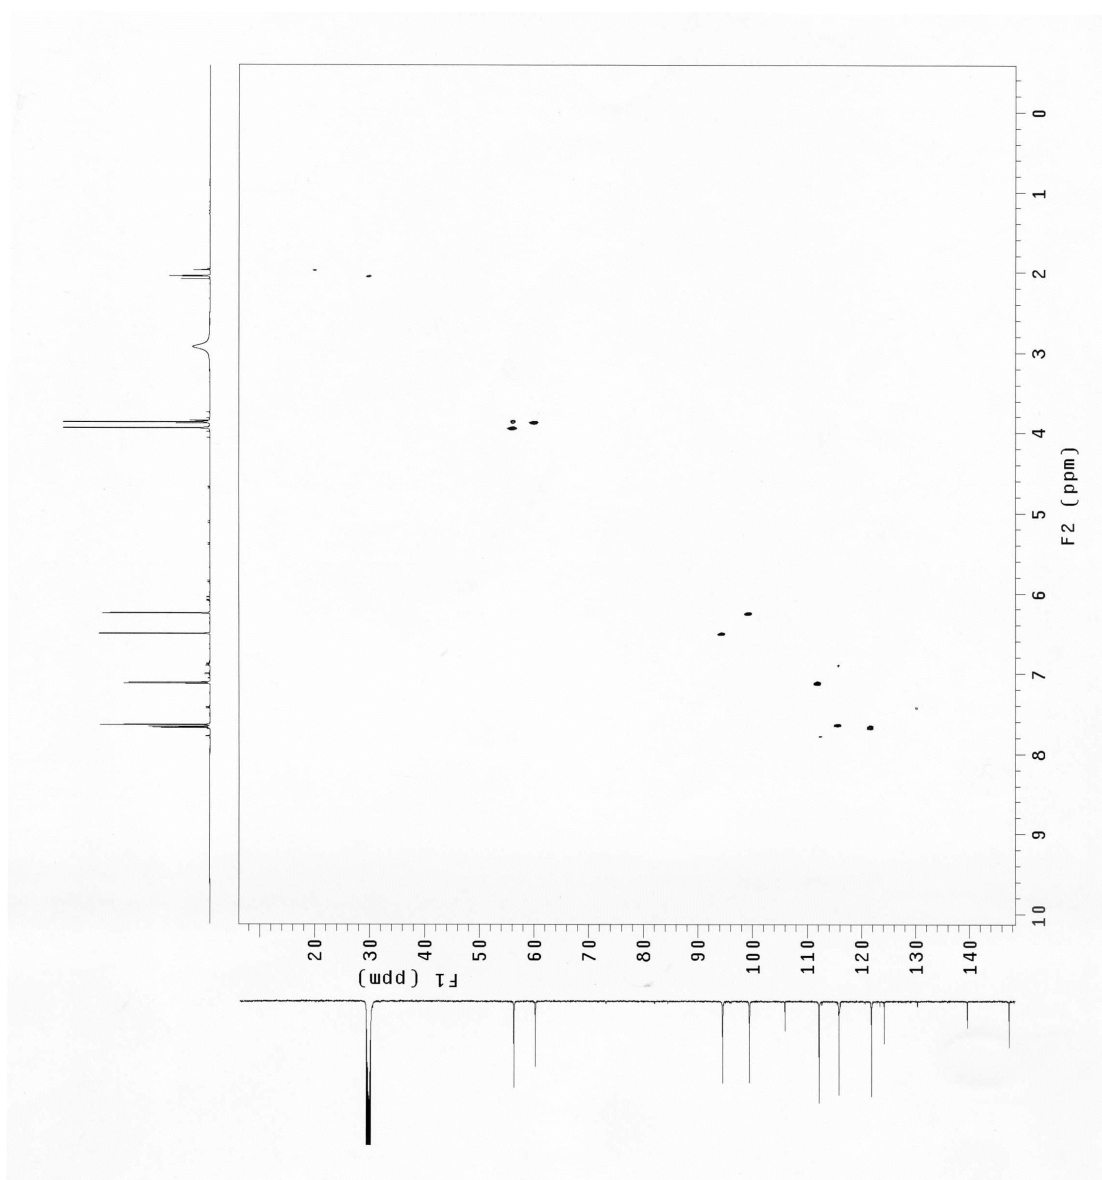

Figure S3. HMQC spectrum of compound **1**

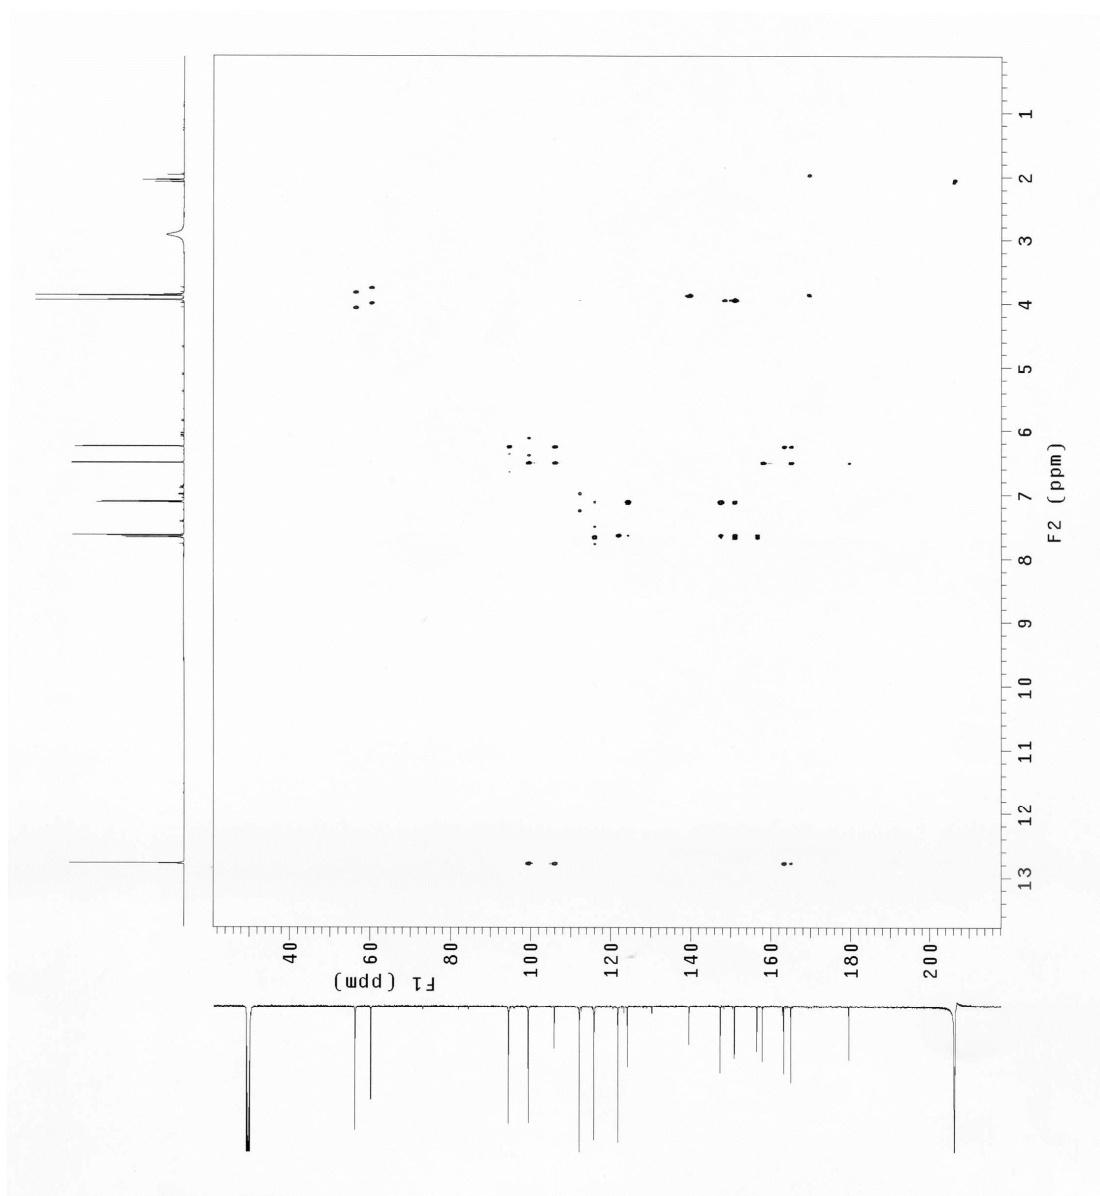

Figure S4. HMBC spectrum of compound **1**

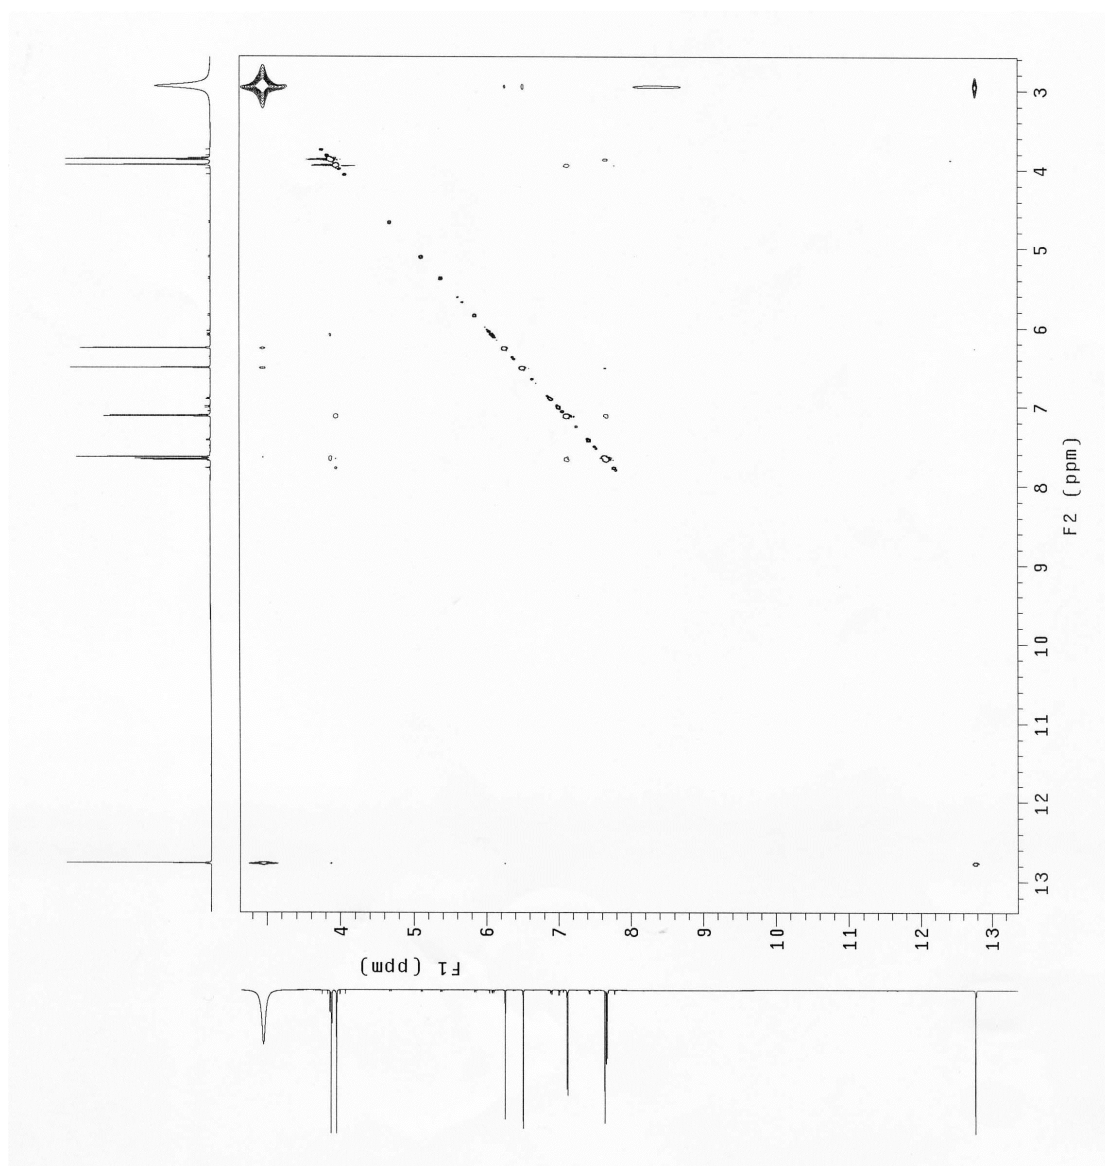

Figure S5. NOESY spectrum of compound **1**
